# Supplementary material for: Hierarchical tube brush-like Co3S4@NiCo-LDH on Ni foam as a bifunctional electrocatalyst for overall water splitting
Source: Royal Society of Chemistry journal article supplement (doi:10.1039/d1nj02093e), 2021-01-01
Supplement: d1nj02093e1.pdf [file d1nj02093e1.pdf]

## Supporting Information

### **Hierarchical tube brush-like $\text{Co}_3\text{S}_4$ @NiCo-LDH on Ni foam as bifunctional electrocatalyst for overall water splitting**

Xiaohu Xu <sup>a\*</sup>, Le Su <sup>a</sup>, Yujie Zhang <sup>a</sup>, Lijuan Dong <sup>b\*</sup>, Xiangyang Miao <sup>a\*</sup>

<sup>a</sup> Key Laboratory of Spectral Measurement and Analysis of Shanxi Province,  
College of Physics and Information Engineering, Shanxi Normal University, No.1  
Gongyuan street, Yaodu District, Linfen 041004, China.

<sup>b</sup> Shanxi Provincial Key Laboratory of Microstructure Electromagnetic Functional  
Materials, Shanxi Datong University, Xingyun street, Nanjiao District, Datong,  
037009, China.

\*Corresponding author. E-mail: bigbrowm@163.com; Tel:+86-13623578753

\*Corresponding author. E-mail: donglijuan\_2012@163.com; Tel:+86-13994319080

\*Corresponding author. E-mail: sxxymiao@126.com; Tel:+86-15035757788

Number of pages: 18

Number of figures: 20

Number of tables: 5

**Content**

## Experimental Section

|                                                                                            |          |
|--------------------------------------------------------------------------------------------|----------|
| XRD patterns in the absence/presence of urea .....                                         | Fig. S1  |
| FE-SEM images in the absence/presence of urea.....                                         | Fig. S2  |
| Polarization curves in the absence/presence of urea.....                                   | Fig. S3  |
| XPS spectrum of O 1s.....                                                                  | Fig. S4  |
| LSV curves with different amounts of $\text{Na}_2\text{S} \cdot 9\text{H}_2\text{O}$ ..... | Fig. S5  |
| LSV curves with different amounts of metal salt.....                                       | Fig. S6  |
| LSV curves with different hydrothermal temperature.....                                    | Fig. S7  |
| Cyclic voltammograms with different scanning rate.....                                     | Fig. S8  |
| LSV curves before and after 3000 cyclic test rates .....                                   | Fig. S9  |
| Quantitative $\text{H}_2$ measurement .....                                                | Fig. S10 |
| FE-SEM images after stability test for HER.....                                            | Fig. S11 |
| XPS spectra after stability test for HER.....                                              | Fig. S12 |
| Nyquist plot .....                                                                         | Fig. S13 |
| FE-SEM images after stability test for OER.....                                            | Fig. S14 |
| XPS spectra after stability test for OER.....                                              | Fig. S15 |
| EDX pattern after stability test for OER.....                                              | Fig. S16 |

|                                                   |          |
|---------------------------------------------------|----------|
| XRD pattern after stability test for OER.....     | Fig. S17 |
| Raman spectra after stability test for OER.....   | Fig. S18 |
| FT-IR spectra after stability test for OER.....   | Fig. S19 |
| Polarization curves without iR compensation ..... | Fig. S20 |
| Comparison of HER performance.....                | Table S1 |
| EIS parameters of different samples for HER ..... | Table S2 |
| EIS parameters of different samples for OER.....  | Table S3 |
| Comparison of OER performance.....                | Table S4 |
| Comparison of Cell voltage.....                   | Table S5 |

## Materials

All chemicals in the experiments were purchased at analytical grade and can be used without further purification. Hydrochloric acid, ethanol, sodium sulfide nonahydrate ( $\text{Na}_2\text{S} \cdot 9\text{H}_2\text{O}$ ), nickel nitrate hexahydrate ( $\text{Ni}(\text{NO}_3)_2 \cdot 6\text{H}_2\text{O}$ ), cobaltous nitrate hexahydrate ( $\text{Co}(\text{NO}_3)_2 \cdot 6\text{H}_2\text{O}$ ), urea ( $\text{CO}(\text{NH}_2)_2$ ) and potassium hydroxide were purchased from Sinopharm Chemical Reagent Co., Ltd. Nickel foam (NF) was obtained from the KunShan Kunag Xun Electronics Co., Ltd. Pt/C (20 wt % Pt), ruthenium(IV) oxide ( $\text{RuO}_2$ ) and Nafion (5 wt %) were purchased from Aladdin Ltd. The deionized (DI) water with a resistivity of  $18.2 \text{ M}\Omega \cdot \text{cm}^{-1}$  used in all experiments was purified through a Millipore system.

**Fabrication of Pt/C/NF:**

For comparison, a benchmark Pt/C electrocatalyst on a NF was fabricated by the following steps: firstly, Pt/C (13.0 mg) and Nafion solution (0.02 mL of 5 wt %) were dispersed in ethanol (0.48 mL). Secondly, the solution underwent sonication for 30 min to form a homogeneous suspension, and then 50  $\mu\text{L}$  of the catalyst ink was dropped on the electrode with a geometrical surface area of  $0.2\text{ cm}^2$ . The loading amount is  $\sim 6.5\text{ mg cm}^{-2}$ .

**Fabrication of RuO<sub>2</sub>/NF:**

Briefly, 20 mg of RuO<sub>2</sub> and 10  $\mu\text{L}$  of 5 wt % Nafion solution were dispersed in 990  $\mu\text{L}$  of anhydrous ethanol followed by ultrasonication for 20 min to form a catalyst ink. Then 65  $\mu\text{L}$  of catalyst ink was loaded on NF with a geometrical surface area of  $0.2\text{ cm}^2$  and naturally dried. Finally, the RuO<sub>2</sub>/NF catalyst was achieved. The mass loading was  $\sim 6.5\text{ mg cm}^{-2}$ .

**Characterization**

The morphology of all samples were investigated by field-emission scanning electron microscopy (FE-SEM, Hitachi, SU-8010) and high-resolution transmission electron microscopy (HR-TEM, JEM-2100, 200 kV) with X-ray energy-dispersive spectroscopy. The crystal diffraction patterns of samples were recorded by X-ray diffractometer (XRD, Bruker D8-Advance) equipped with a Cu K $\alpha$  radiation source ( $\lambda = 1.5418\text{ \AA}$ ). The surface composition and valence state of the samples were characterized by X-ray photoelectron spectroscopy (XPS, Kratos Axis Ultra DLD). Raman characterization was performed on a Renishaw-inVia Raman spectrometer

with 532 nm laser excitation. Fourier transform infrared spectroscopy (FTIR, Nicolet) was used to get the fingerprint of chemical bonding vibration of the material.

### **Electrochemical measurements**

All electrochemical data tests were obtained by an electrochemical workstation (CHI 760E, CH Instruments, China) with a three-electrode cell configuration. The three-electrode cell employed the as-prepared samples supported on Ni foam as the working electrode, a mercury oxide electrode (Hg/HgO) as the reference one, and a carbon rod (4 mm in diameter) as the counter one, respectively. Cyclic Voltammetry (CV) measurements were conducted for OER and HER at the potential ranging from 0 to 1 V (vs. Hg/HgO), -1.5 to -1 V (vs. Hg/HgO) at a scan rate of 200 mV s<sup>-1</sup>, respectively. Polarization curves for OER and HER were obtained using Linear Sweep Voltammetry (LSV) with a scan rate of 3 and 5 mV s<sup>-1</sup> in an O<sub>2</sub> saturated 1.0 M KOH, respectively. When the signals of working electrodes stabilized after scanning several times, the data were collected. Electrochemical impedance spectroscopy (EIS) experiments were performed in the frequency range from 100 KHz to 1 Hz with an amplitude potential of 5 mV. The stability test was implemented using chronopotentiometric method at certain potentials. All the potentials with regard to Hg/HgO, reported in this work, were converted to the reversible hydrogen electrode (RHE) according to the following equation:  $E(\text{RHE}) = E(\text{vs. Hg/HgO}) + 0.059 \times \text{pH} + 0.098$ . All the measurements above were corrected by manual iR compensation using the current and the solution resistance.

### **Effect of urea during the hydrothermal reaction**

Urea, as a common surfactant, can control the precipitation of cations by generating hydroxide ions in solution slowly through mild hydrolysis. Meanwhile, the surfactant effects of urea hydrolysis have been used to assist the synthesis of crystals with particular morphologies, such as nanosheets, nanowires, nanoflowers and so on. Thus, in order to obtain the target morphology of the catalysts, urea was added in the first and third steps of the hydrothermal reaction under different temperature. In addition, the adding of urea also affects the catalytic performance towards HER and OER of the final hydrothermal sample. In order to verify the above statement, we also conducted three sets of comparison experiments to compare the crystal phase, morphology of the hydrothermal product and the corresponding catalytic performances in the absence/presence of urea, which are displayed in the following. As can be seen from the Fig.S1 and R2, the addition of urea not only affect the crystal phase of hydrothermal samples but also changes the corresponding morphology of as-prepared samples. Meanwhile, the catalytic activity of CoCHH/NF and  $\text{Co}_3\text{S}_4$ @NiCo-LDH/NF is more or less improved for both HER and OER in the presence of urea as shown in Fig.S3, which may be attributed to the difference of morphology of the samples after adding urea. To sum up, urea was chosen to add during the hydrothermal process.

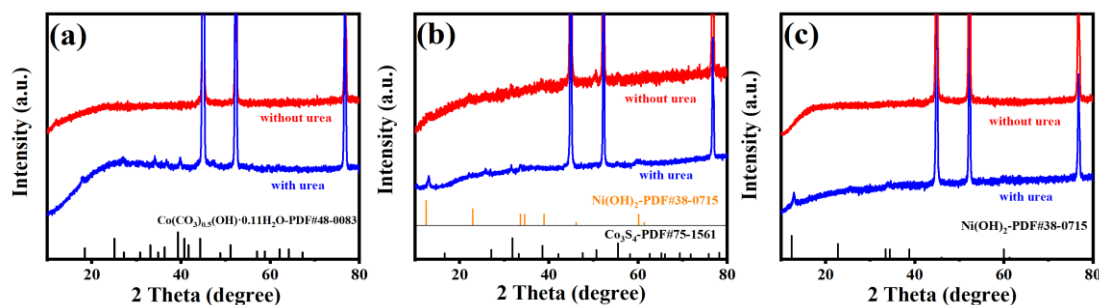

Fig. S1 XRD patterns of products obtained in the absence/presence of urea:  
(a) CoCHH/NF; (b)  $\text{Co}_3\text{S}_4$ @NiCo-LDH/NF; (c) NiCo-LDH/NF.

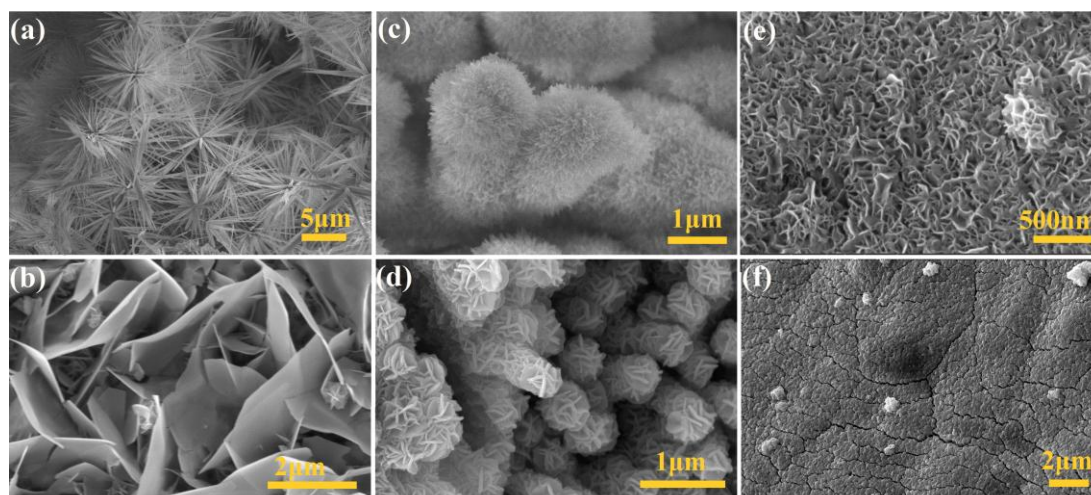

Fig. S2 FE-SEM images of products obtained in the absence (bottom)/presence (top) of urea: (a, b) CoCHH/NF; (c, d)  $\text{Co}_3\text{S}_4$ @NiCo-LDH/NF; (e, f) NiCo-LDH/NF.

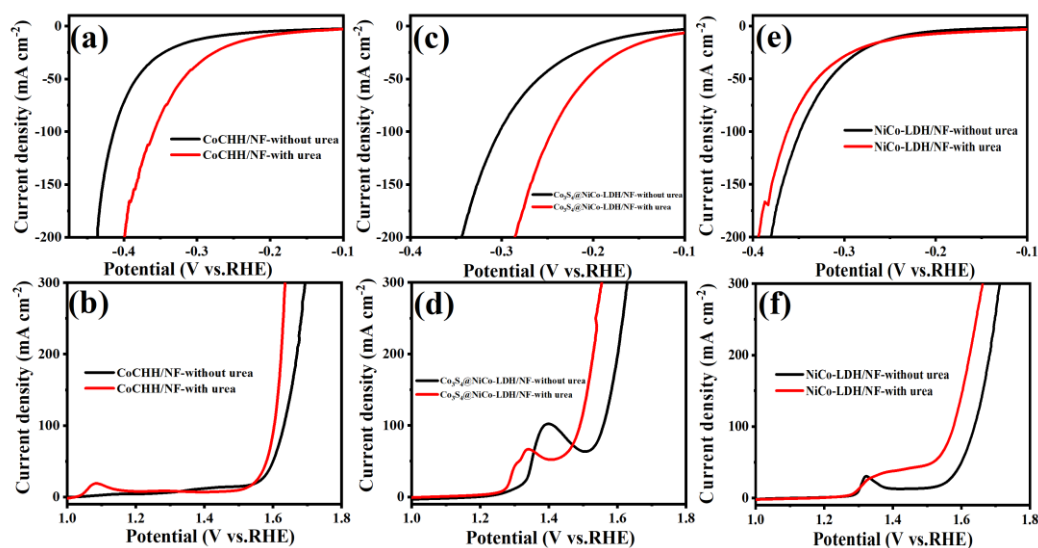

Fig. S3 Polarization curves for HER and OER in the absence/presence of urea: (a, b) CoCHH/NF; (c, d)  $\text{Co}_3\text{S}_4$ @NiCo-LDH/NF; (e, f) NiCo-LDH/NF.

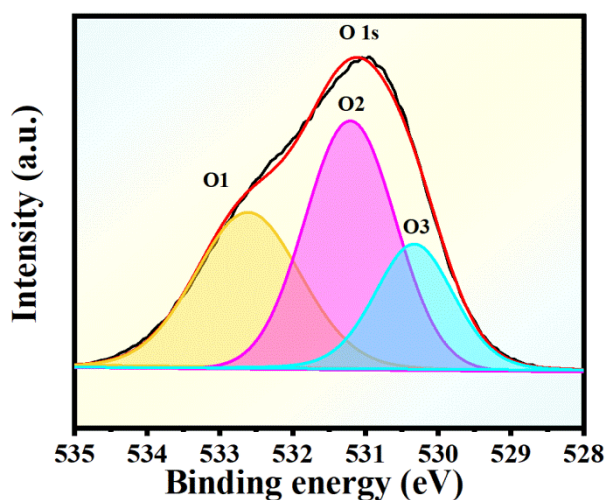

Fig. S4. High-resolution XPS spectrum of O 1s for  $\text{Co}_3\text{S}_4$ @NiCo-LDH.

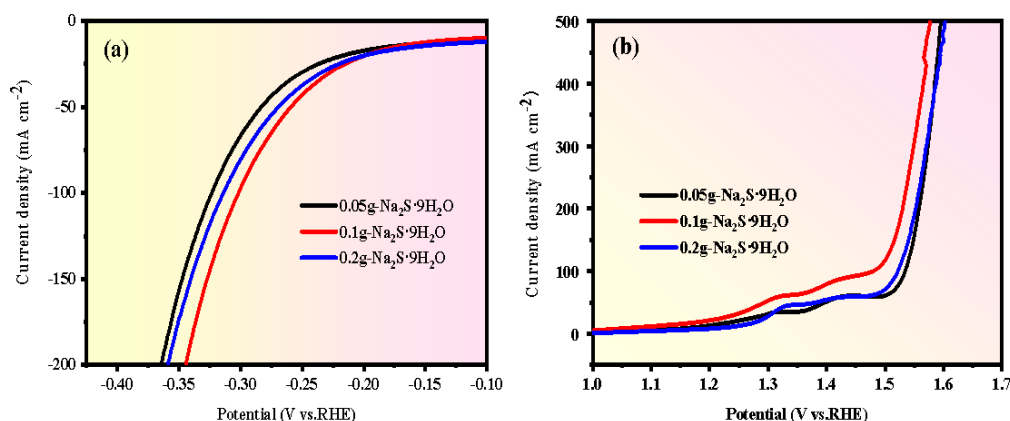

**Fig. S5.** (a) HER polarization curves and (b) OER polarization curves of Co<sub>3</sub>S<sub>4</sub>/NF samples synthesized with different amounts of Na<sub>2</sub>S·9H<sub>2</sub>O.

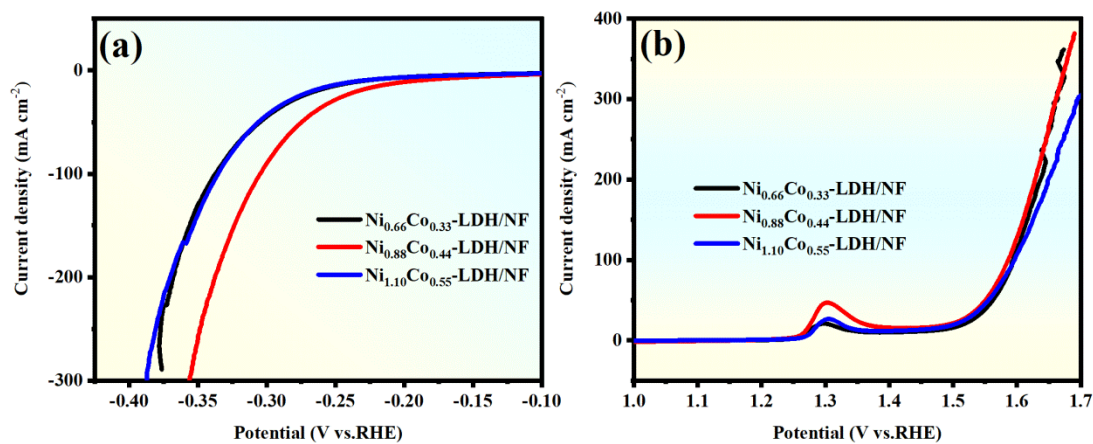

**Fig. S6.** (a) HER polarization curves and (b) OER polarization curves of NiCo-LDH/NF samples synthesized with different amounts of Co(NO<sub>3</sub>)<sub>2</sub>·6H<sub>2</sub>O and Ni(NO<sub>3</sub>)<sub>2</sub>·6H<sub>2</sub>O.

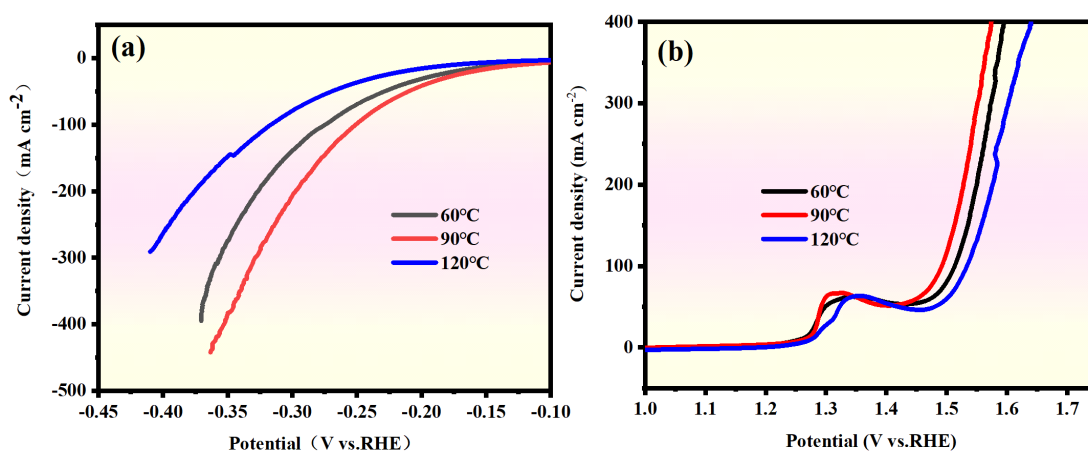

**Fig. S7.** (a) HER polarization curves and (b) OER polarization curves of Co<sub>3</sub>S<sub>4</sub>@NiCo-LDH/NF samples synthesized by different hydrothermal temperature.



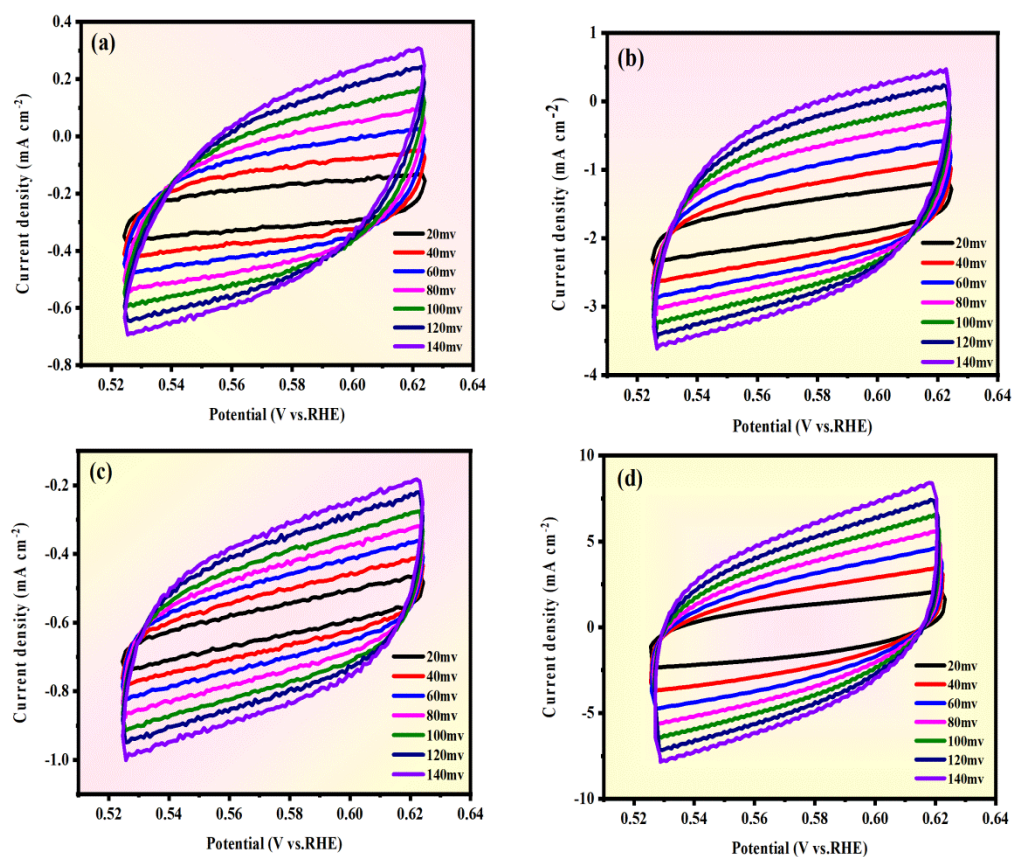

**Fig. S8.** CV curves of (a) NF, (b)  $\text{Co}_3\text{S}_4/\text{NF}$ , (c)  $\text{NiCo-LDH}/\text{NF}$ , (d)  $\text{Co}_3\text{S}_4@\text{NiCo-LDH}/\text{NF}$  in the non-faradaic region with different scanning rates from 20 to  $140 \text{ mV s}^{-1}$ .

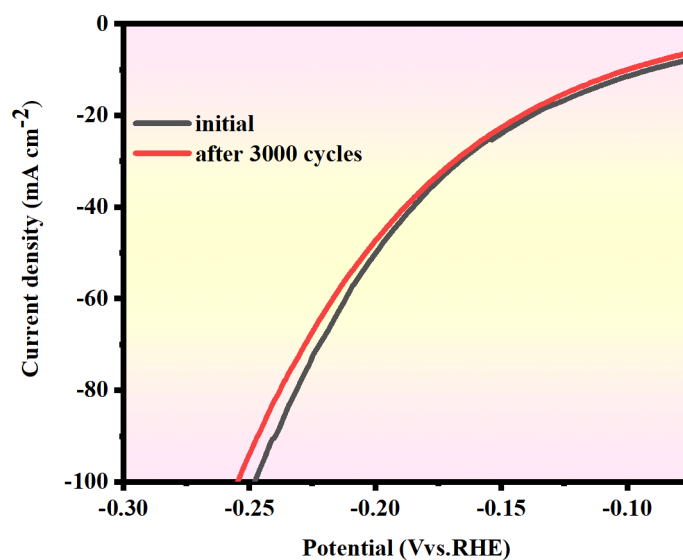

**Fig. S9.** LSV curves of  $\text{Co}_3\text{S}_4@\text{NiCo-LDH}/\text{NF}$  before and after 3000 cycles.

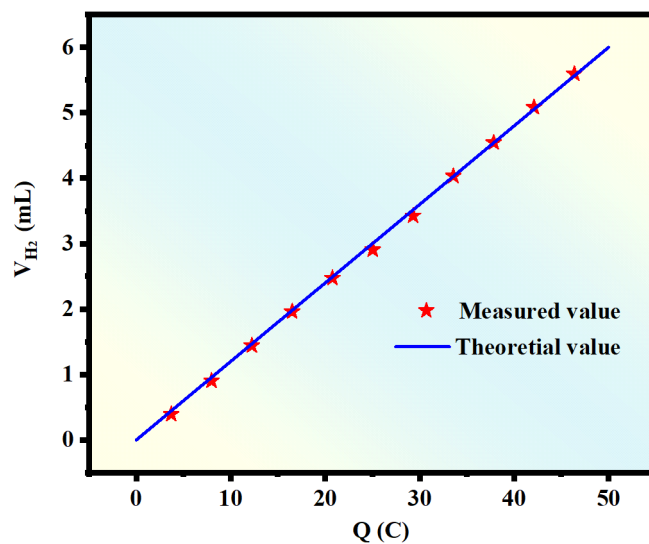

**Fig. S10.** Quantitative H<sub>2</sub> measurement via water displacement.

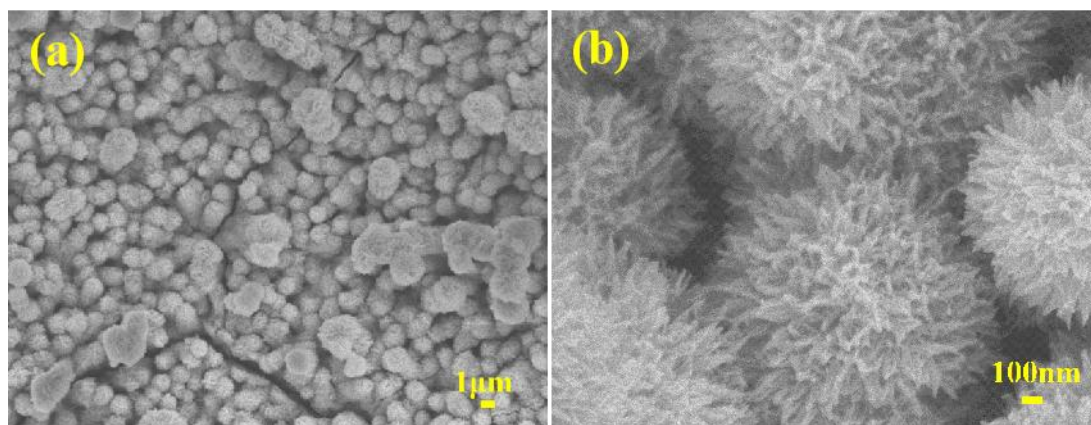

**Fig. S11.** Representative FE-SEM images of the Co<sub>3</sub>S<sub>4</sub>@NiCo-LDH/NF catalyst after continuous 20 h for HER.

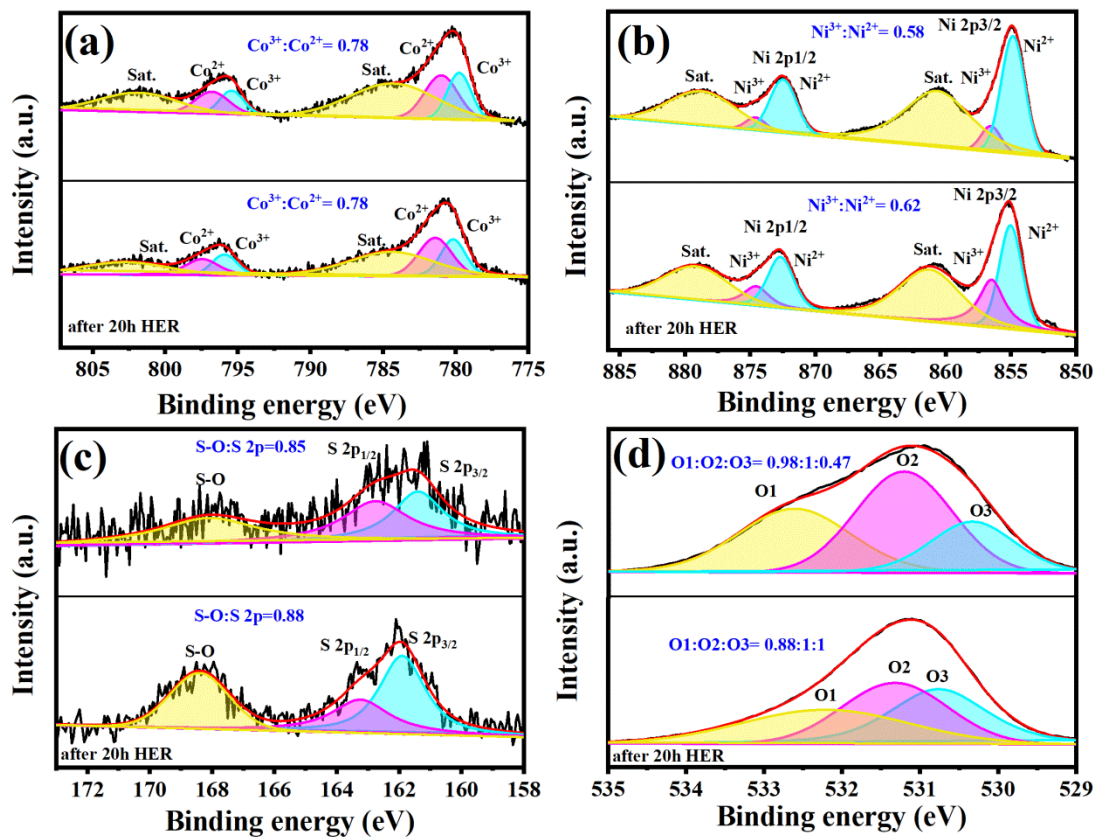

**Fig. S12.** (a) XPS full survey spectrum of  $\text{Co}_3\text{S}_4@\text{NiCo-LDH/NF}$  after continuous 20 h HER electrolysis. High-resolution XPS spectrum: (b) Co 2p, (c) Ni 2p, and (d) S 2p.

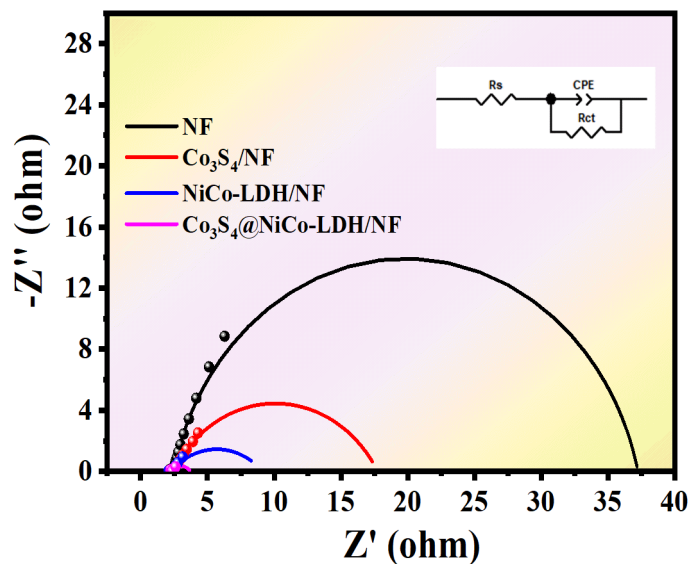

**Fig. S13.** Nyquist plot of the NF, NiCo-LDH/NF,  $\text{Co}_3\text{S}_4/\text{NF}$ ,  $\text{Co}_3\text{S}_4@\text{NiCo-LDH/NF}$  catalysts at overpotential of 100 mV vs. RHE.

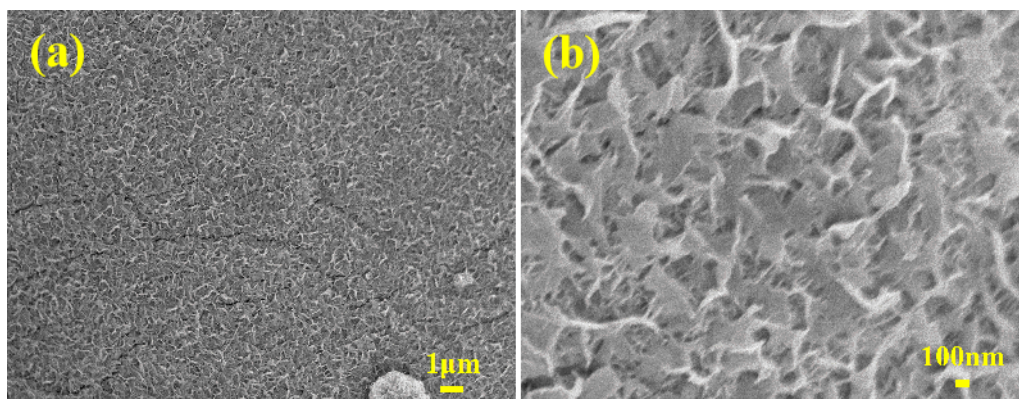

**Fig. S14.** Representative FE-SEM images of the  $\text{Co}_3\text{S}_4@\text{NiCo-LDH/NF}$  catalyst after continuous 20 h at  $10 \text{ mA cm}^{-2}$  for OER.

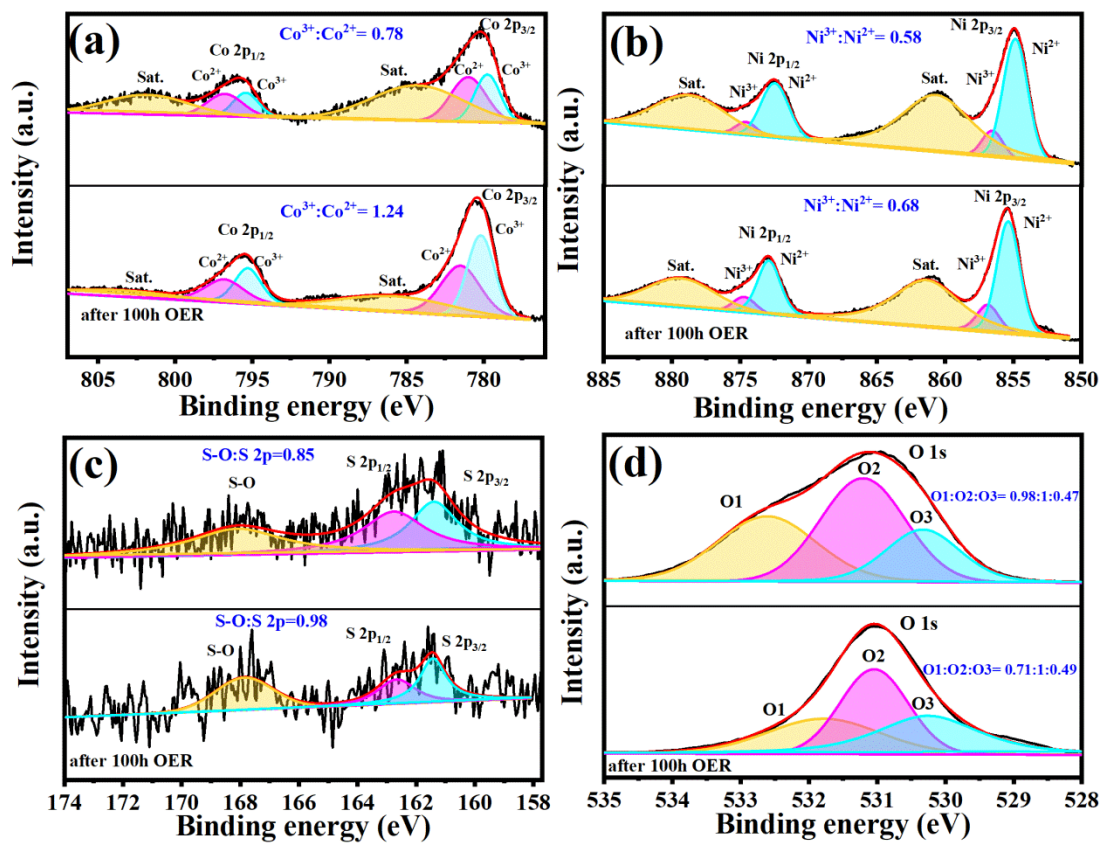

**Fig. S15.** (a) XPS full survey spectrum of  $\text{Co}_3\text{S}_4@\text{NiCo-LDH/NF}$  after OER test for 20 h. High-resolution XPS spectrum: (b) Co 2p, (c) Ni 2p, and (d) S 2p.



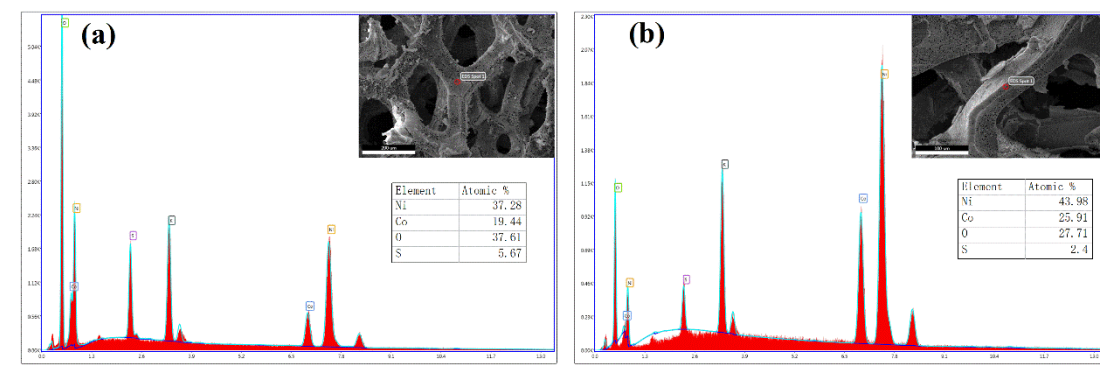

**Fig. S16** EDX pattern of  $\text{Co}_3\text{S}_4@ \text{NiCo-LDH/NF}$  before and after OER stability test at  $100 \text{ mA cm}^{-2}$  for 20 h.

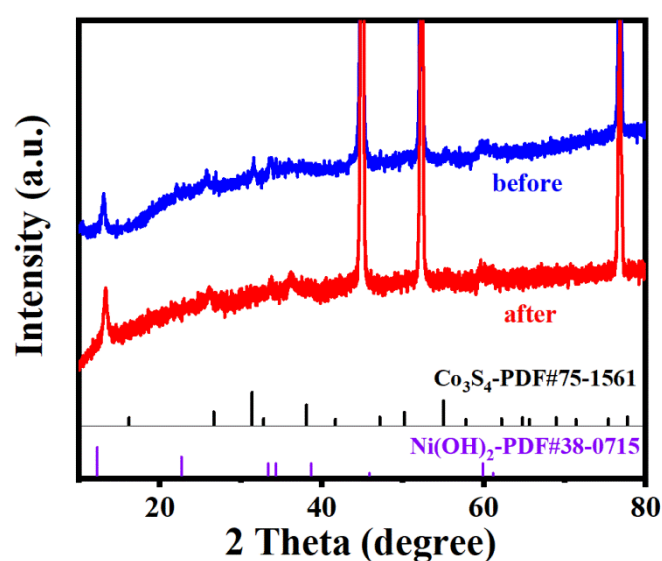

**Fig. S17** XRD patterns of  $\text{Co}_3\text{S}_4@ \text{NiCo-LDH/NF}$  before and after OER stability test at  $100 \text{ mA cm}^{-2}$  for 20 h.

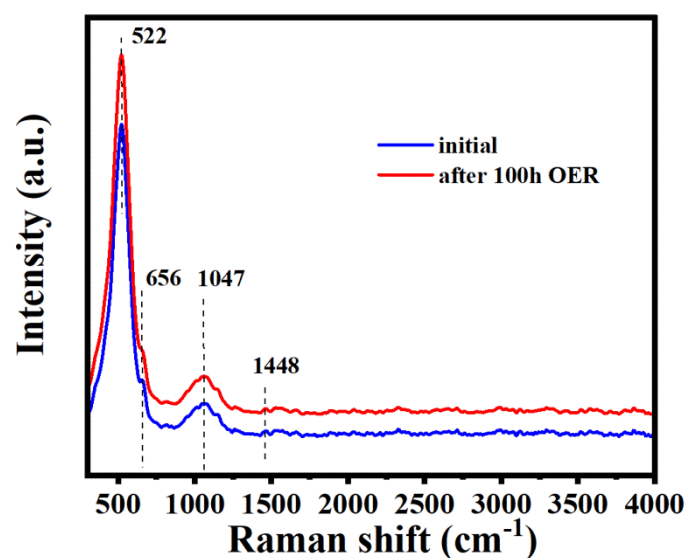

**Fig. S18** Raman spectra of  $\text{Co}_3\text{S}_4@ \text{NiCo-LDH/NF}$  before and after OER stability test at  $100 \text{ mA cm}^{-2}$  for 100 h.

The observed peaks at 522 and 656  $\text{cm}^{-1}$  can be assigned to  $\text{Co}_3\text{S}_4$ , and the peaks at 1047 and 1448  $\text{cm}^{-1}$  are ascribed to NiCo-LDH.

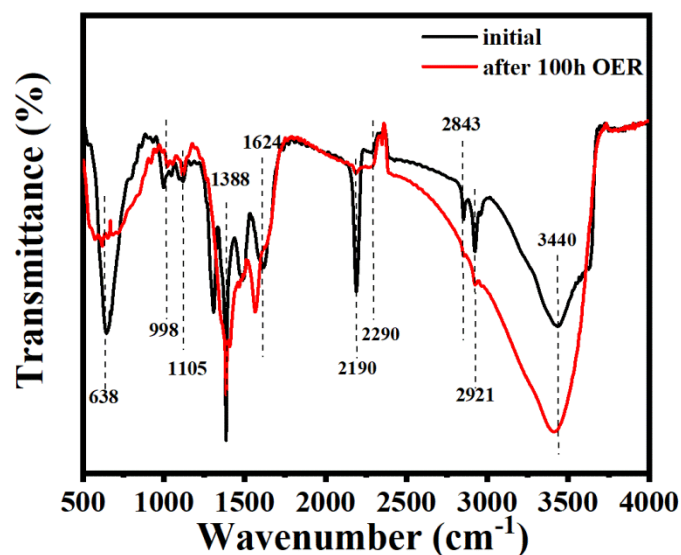

**Fig. S19** FTIR spectra of  $\text{Co}_3\text{S}_4@$ NiCo-LDH//NF before and after OER stability test at  $100 \text{ mA cm}^{-2}$  for 100 h.

FT-IR spectroscopy studies of the  $\text{Co}_3\text{S}_4@$ NiCo-LDH/NF before and after OER stability test are carried out separately to provide a fingerprint of molecular vibrations and identify the characteristic functional group of the as-prepared samples in Figure R10. The broad band at around 3440 and 1624  $\text{cm}^{-1}$  is ascribed to the stretching and bending vibrations of OH. The absorption bands displayed at 638, 998 and 1105  $\text{cm}^{-1}$  were attributed to the stretching vibrations of M-O, M-O-M and O-M-O (M = Ni and Co). The sharp bands at 2843 and 2921  $\text{cm}^{-1}$  were related to the  $\nu_{\text{C-O}}$  and  $\nu_{\text{C-H}}$  vibration modes.

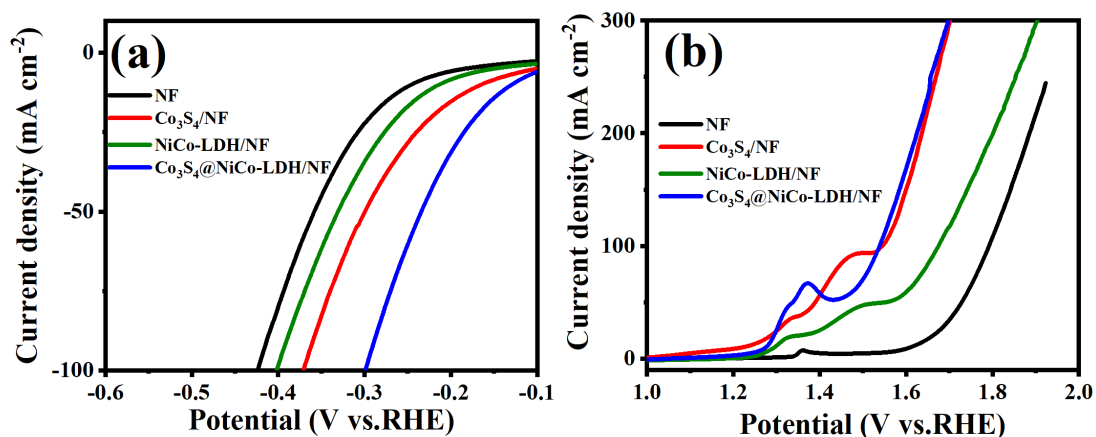

**Fig. S20** Polarization curves without iR compensation of all samples towards: (a) HER and (b) OER, respectively.

**Table. S1.** Comparisons of HER catalytic activity of  $\text{Co}_3\text{S}_4@\text{NiCo-LDH}$  with some previous reported catalysts in 1 mol/L KOH solution.

| Catalyst                                    | Substrate             | Overpotential (mV)<br>@ $j=10 \text{ mA cm}^{-2}$ | Reference |
|---------------------------------------------|-----------------------|---------------------------------------------------|-----------|
| $\text{Co}_3\text{S}_4@\text{NiCo-LDH}$     | Ni foam               | 125                                               | This work |
| $\text{NiCo}_2\text{O}_4/\text{FeNi-LDH}$   | Ni foam               | 192                                               | [1]       |
| $\text{Co}_{0.85}\text{Se}/\text{FeNi-LDH}$ | Ni foam               | 260                                               | [2]       |
| $\text{NiCo}_2\text{S}_4/\text{NiFe-LDH}$   | Ni foam               | 200                                               | [3]       |
| $\text{CoS}_2$                              | Carbon cloth          | 193                                               | [4]       |
| $\text{NiCo-LDH}$                           | Ni foam               | 162                                               | [5]       |
| $\text{Co}_9\text{S}_8@\text{NiCo-LDH}$     | Ni foam               | 168                                               | [6]       |
| $\text{FeCo}_2\text{S}_4@\text{CoFe-LDH}$   | Ni foam               | 115                                               | [7]       |
| $\text{CuO}@\text{CoZn-LDH}$                | Cu foam               | 124                                               | [8]       |
| $\text{NiFe-LDH}@\text{NiCoP}$              | Ni foam               | 120                                               | [9]       |
| $\text{Co}_3\text{O}_4@\text{NiFe-LDH}$     | Ni foam               | 74                                                | [10]      |
| $\text{NiFe-LDH}@\text{Ni}_3\text{S}_2$     | Ni foam               | 184                                               | [11]      |
| $\text{Ni}_3\text{Se}_4@\text{NiFe-LDH}$    | carbon fiber<br>cloth | 85                                                | [12]      |
| $\text{CoNi}_2\text{S}_4@\text{NiMn LDH}$   | carbon cloth          | 82                                                | [13]      |
| $\text{CoCO}_3@\text{NiFe-LDH}$             | Ni foam               | 171                                               | [14]      |
| $\text{Ni}_3\text{N-NiMoN}$                 | carbon cloth          | 31                                                | [15]      |

Mo<sub>x</sub>W<sub>1-x</sub>S<sub>2</sub>@Ni<sub>3</sub>S<sub>2</sub>

Ni foam

98

[16]

**Table. S2.** EIS parameters of different samples for HER.

| Electrode                                   | $R_s$ ( $\Omega$ ) | $R_{CT}$ ( $\Omega$ ) |
|---------------------------------------------|--------------------|-----------------------|
| Ni foam                                     | 2.59               | 33.51                 |
| NiCo-LDH/NF                                 | 2.74               | 14.09                 |
| Co <sub>3</sub> S <sub>4</sub> /NF          | 2.58               | 10.68                 |
| Co <sub>3</sub> S <sub>4</sub> @NiCo-LDH/NF | 2.53               | 2.30                  |

**Table. S3.** EIS parameters of different samples for OER.

| Electrode                                   | $R_s$ ( $\Omega$ ) | $R_{CT}$ ( $\Omega$ ) |
|---------------------------------------------|--------------------|-----------------------|
| Ni foam                                     | 2.44               | 34.79                 |
| NiCo-LDH/NF                                 | 2.25               | 6.87                  |
| Co <sub>3</sub> S <sub>4</sub> /NF          | 2.42               | 15.33                 |
| Co <sub>3</sub> S <sub>4</sub> @NiCo-LDH/NF | 2.33               | 1.37                  |

**Table. S4.** Comparison of OER catalytic performance of Co<sub>3</sub>S<sub>4</sub>@NiCo-LDH/NF with other recently reported non-precious metal electrocatalysts in 1 mol/L KOH solution.

| Catalyst                                   | Substrate             | Overpotential (mV)<br>@ $j$ mA cm <sup>-2</sup> | Reference |
|--------------------------------------------|-----------------------|-------------------------------------------------|-----------|
| Co <sub>3</sub> S <sub>4</sub> @NiCo-LDH   | Ni foam               | 262 @ 100                                       | This work |
| NiCo <sub>2</sub> O <sub>4</sub> /FeNi-LDH | Ni foam               | 290 @ 50                                        | [1]       |
| CoS <sub>2</sub>                           | Carbon cloth          | ~350 @ 100<br>276 @ 10                          | [4]       |
| NiCo-LDH                                   | Ni foam               | ~370 @ 100<br>271 @ 10                          | [5]       |
| Co <sub>9</sub> S <sub>8</sub> @NiCo-LDH   | Ni foam               | 330 @ 100                                       | [6]       |
| FeCo <sub>2</sub> S <sub>4</sub> @CoFe-LDH | Ni foam               | 259 @ 100                                       | [7]       |
| CuO@CoZn-LDH                               | Cu foam               | 279 @ 100                                       | [8]       |
| Co <sub>3</sub> O <sub>4</sub> @NiFe-LDH   | Ni foam               | 269 @ 100                                       | [10]      |
| NiFe-LDH@Ni <sub>3</sub> S <sub>2</sub>    | Ni foam               | ~420 @ 100<br>271 @ 20                          | [11]      |
| Ni <sub>3</sub> Se <sub>4</sub> @NiFe-LDH  | carbon fiber<br>cloth | ~280 @ 100<br>223 @ 10                          | [12]      |
| CoNi <sub>2</sub> S <sub>4</sub> @NiMn LDH | carbon cloth          | 269 @ 100                                       | [13]      |
| CoCO <sub>3</sub> @NiFe-LDH                | Ni foam               | ~380 @ 100<br>232 @ 20                          | [14]      |



|                                                             |         |                                |      |
|-------------------------------------------------------------|---------|--------------------------------|------|
| $\text{Mo}_x\text{W}_{1-x}\text{S}_2@\text{Ni}_3\text{S}_2$ | Ni foam | $\sim 360 @ 100$<br>$285 @ 10$ | [16] |
|-------------------------------------------------------------|---------|--------------------------------|------|

**Table S5.** Comparison cell voltage of hierarchical  $\text{Co}_3\text{S}_4@\text{NiCo-LDH/NF}$  with other bifunctional electrocatalysts in 1 mol/L KOH solution.

| Catalyst                                                    | Substrate             | cell voltage (V) @<br>$j=10 \text{ mA cm}^{-2}$ | Reference |
|-------------------------------------------------------------|-----------------------|-------------------------------------------------|-----------|
| $\text{Co}_3\text{S}_4@\text{NiCo-LDH}$                     | Ni foam               | 1.59                                            | This work |
| $\text{NiCo}_2\text{O}_4/\text{FeNi-LDH}$                   | Ni foam               | 1.6                                             | [1]       |
| $\text{Co}_{0.85}\text{Se}/\text{FeNi-LDH}$                 | graphene foil         | 1.67                                            | [2]       |
| $\text{NiCo}_2\text{S}_4/\text{NiFe-LDH}$                   | Ni foam               | 1.6                                             | [3]       |
| $\text{CoS}_2$                                              | Carbon cloth          | 1.67                                            | [4]       |
| $\text{NiCo-LDH}$                                           | Ni foam               | 1.66                                            | [5]       |
| $\text{Co}_9\text{S}_8@\text{NiCo-LDH}$                     | Ni foam               | 1.63                                            | [6]       |
| $\text{FeCo}_2\text{S}_4@\text{CoFe-LDH}$                   | Ni foam               | 1.6                                             | [7]       |
| $\text{CuO}@\text{CoZn-LDH}$                                | Cu foam               | 1.55                                            | [8]       |
| $\text{NiFe-LDH}@\text{NiCoP}$                              | Ni foam               | 1.57                                            | [9]       |
| $\text{Co}_3\text{O}_4@\text{NiFe LDH}$                     | Ni foam               | 1.56                                            | [10]      |
| $\text{NiFe-LDH}@\text{Ni}_3\text{S}_2$                     | Ni foam               | 1.65                                            | [11]      |
| $\text{Ni}_3\text{Se}_4@\text{NiFe LDH}$                    | carbon fiber<br>cloth | 1.54                                            | [12]      |
| $\text{CoNi}_2\text{S}_4@\text{NiMn LDH}$                   | carbon cloth          | 1.5                                             | [13]      |
| $\text{CoCO}_3@\text{NiFe-LDH}$                             | Ni foam               | 1.67                                            | [14]      |
| $\text{Ni}_3\text{N-NiMoN}$                                 | carbon cloth          | 1.54                                            | [15]      |
| $\text{Mo}_x\text{W}_{1-x}\text{S}_2@\text{Ni}_3\text{S}_2$ | Ni foam               | 1.62                                            | [16]      |

## References

- (1) Z. Wang, S. Zeng, W. Liu, X. Wang, Q. Li, Z. Zhao and F. Geng, *ACS Appl. Mater. Inter.*, 2017, **9** (2), 1488-1495.
- (2) Y. Hou, M. R. Lohe, J. Zhang, S. Liu, X. Zhuang and X. Feng, *Energ. Environ.*

- Sci.*, 2016, **9** (2), 478-483.
- (3) J. Liu, J. Wang, B. Zhang, Y. Ruan, L. Lv, X. Ji, K. Xu, L. Miao and J. Jiang, *ACS Appl. Mater. Inter.*, 2017, **9** (18), 15364-15372.
- (4) C. Guan, X. Liu, A. M. Elshahawy, H. Zhang, H. Wu, S. J. Pennycook and J. Wang, *Nanoscale Horiz.*, 2017, **2** (6), 342-348.
- (5) W. Liu, J. Bao, M. Guan, Y. Zhao, J. Lian, J. Qiu, L. Xu, Y. Huang, J. Qian and H. Li, *Dalton T.*, 2017, **46** (26), 8372-8376.
- (6) J. Yan, L. Chen and X. Liang, *Sci. Bull.*, 2019, **64** (3), 158-165.
- (7) Y. Huang, X. Chen, S. Ge, Q. Zhang, X. Zhang, W. Li and Y. Cui, *Catal. Sci. Technol.*, 2020, **10** (5), 1292-1298.
- (8) L. Yin, X. Du, C. Di, M. Wang, K. Su and Z. Li, *Chem. Eng. J.*, 2021, **414** (15), 128809.
- (9) H. Zhang, X. Li, A. Hähnel, V. Naumann, C. Lin, S. Azimi, S. L. Schweizer, A. W. Maijenburg and R. B. Wehrspohn, *Adv. Funct. Mater.*, 2018, **28** (14), 1706847.
- (10) S. Wang, J. Wu, J. Yin, Q. Hu, D. Geng and L.-M. Liu, *ChemElectroChem*, 2018, **5** (10), 1357-1363.
- (11) X. Liang, Y. Li, H. Fan, S. Deng, X. Zhao, M. Chen, G. Pan, Q. Xiong and X. Xia, *Nanotechnology*, 2019, **30** (48), 484001.
- (12) T. Zhang, L. Hang, Y. Sun, D. Men, X. Li, L. Wen, X. Lyu and Y. Li, *Nanoscale Horiz.*, 2019, **4** (5), 1132-1138.
- (13) P. Wang, J. Qi, C. Li, W. Li, T. Wang and C. Liang, *Electrochim. Acta*, 2020, **345**, 136247.
- (14) R. Que, S. Liu, P. He, Y. Yang and Y. Pan, *Mater. Lett.*, 2020, **277**, 128285.
- (15) A. Wu, Y. Xie, H. Ma, C. Tian, Y. Gu, H. Yan, X. Zhang, G. Yang and H. Fu, *Nano Energy*, 2018, **44**, 353-363.
- (16) M. Zheng, J. Du, B. Hou and C. L. Xu, *ACS Appl. Mater. Inter.*, 2017, **9** (31), 26066-26076.
